# Supplementary material for: Basal tolerance to heat and cold exposure of the spotted wing drosophila, Drosophila suzukii
Source: PubMed Central journal article supplement (PMC5366067; doi:10.7717/peerj.3112), 2017-03-23
Supplement: peerj-05-3112-s009.pdf [file peerj-05-3112-s009.pdf]

**Temperatures and respective exposure durations  
used for adult's cold tolerance assays.**

| <b>-5 °C</b> | <b>-2.5 °C</b> | <b>0 °C</b> | <b>2.5 °C</b> | <b>5 °C</b> | <b>7.5 °C</b> |
|--------------|----------------|-------------|---------------|-------------|---------------|
| 20 min       | 20 min         | 12 h        | 12 h          | 2 d         | 2 d           |
| 40 min       | 40 min         | 24 h        | 24 h          | 3 d         | 5 d           |
| 60 min       | 1 h            | 36 h        | 36 h          | 6 d         | 10 d          |
| 80 min       | 2 h30          | 48 h        | 48 h          | 9 d         | 15 d          |
| 100 min      | 4 h            | 60 h        | 3 d           | 12 d        | 20 d          |
| 2 h          | 7 h            | 3 d         | 4 d           | 15 d        | 30 d          |
|              | 10 h           |             |               |             |               |
|              | 12 h           |             |               |             |               |
