# Supplementary material for: Basal tolerance to heat and cold exposure of the spotted wing drosophila, Drosophila suzukii
Source: PubMed Central journal article supplement (PMC5366067; doi:10.7717/peerj.3112), 2017-03-23
Supplement: peerj-05-3112-s010.pdf [file peerj-05-3112-s010.pdf]

**Temperatures and respective exposure durations  
used for pupae's cold tolerance assays.**

| <b>-5 °C</b> | <b>-2.5 °C</b> | <b>0 °C</b> | <b>2.5 °C</b> | <b>5 °C</b> | <b>7.5 °C</b> |
|--------------|----------------|-------------|---------------|-------------|---------------|
| 15 min       | 15 min         | 2 h         | 6 h           | 6 h         | 1 d           |
| 30 min       | 30 min         | 4 h         | 12 h          | 12 h        | 2 d           |
| 45 min       | 45 min         | 8 h         | 24 h          | 24 h        | 5 d           |
| 1 h          | 1 h            | 12 h        | 36 h          | 36 h        | 7 d           |
| 1 h30        | 1 h30          | 24 h        | 3 d           | 3 d         | 10 d          |
| 2 h          | 2 h            | 48 h        | 4 d           | 5 d         | 12 d          |
| 2 h30        | 4 h            | 72 h        |               |             |               |
