# Supplementary material for: Basal tolerance to heat and cold exposure of the spotted wing drosophila, Drosophila suzukii
Source: PubMed Central journal article supplement (PMC5366067; doi:10.7717/peerj.3112), 2017-03-23
Supplement: peerj-05-3112-s012.pdf [file peerj-05-3112-s012.pdf]

**Temperatures and respective exposure durations  
used for pupae's heat tolerance assays.**

| <b>30 °C</b> | <b>31 °C</b> | <b>32 °C</b> | <b>33 °C</b> | <b>34 °C</b> | <b>35 °C</b> | <b>37 °C</b> |
|--------------|--------------|--------------|--------------|--------------|--------------|--------------|
| 2 d          | 12 h         | 6 h          | 4 h          | 2 h          | 2 h          | 1 h          |
| 4 d          | 24 h         | 12 h         | 8 h          | 6 h          | 6 h          | 2 h          |
| 6 d          | 2 d          | 24 h         | 12 h         | 12 h         | 12 h         | 3 h          |
| 8 d          | 3 d          | 48 h         | 24 h         | 24 h         | 24 h         | 4 h          |
| 10 d         | 4 d          | 60 h         | 36 h         | 36 h         | 36 h         | 5 h          |
| 15 d         | 5 d          | 4 d          | 48 h         | 48 h         | 48 h         | 6 h          |
|              |              |              |              |              |              | 7 h          |
|              |              |              |              |              |              | 10 h         |
